# Supplementary material for: Tyrosine-functionalized CuInS2 quantum dots as a fluorescence probe for the determination of biothiols, histidine and threonine
Source: Royal Society of Chemistry journal article supplement (doi:10.1039/c3an00758h), 2013-01-01
Supplement: c3an00758h.pdf [file c3an00758h.pdf]

## Supporting information

### Tyrosine-functionalized CuInS<sub>2</sub> quantum dots as a fluorescence probe for the determination of biothiols, histidine and threonine

Siyu Liu,<sup>a</sup> Fanping Shi,<sup>a</sup> Lu Chen,<sup>a</sup> Xingguang Su<sup>a\*</sup>

<sup>a</sup>Department of Analytical Chemistry, College of Chemistry, Jilin University, Changchun, 130012, China.

E-mail address: suxg@jlu.edu.cn

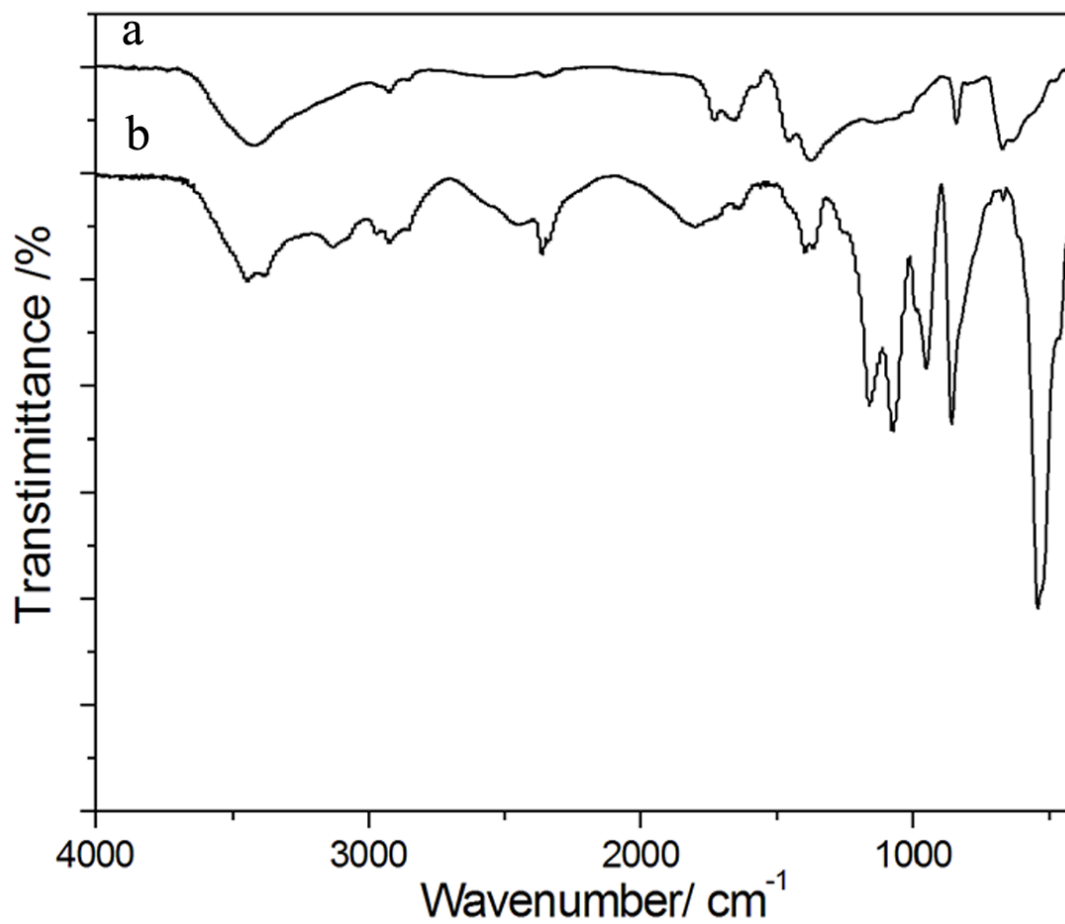

**Fig. S1** (A) The FT-IR spectra of the MPA-capped CuInS<sub>2</sub>QDs (curve a) and T-CuInS<sub>2</sub> QDs (curve b).

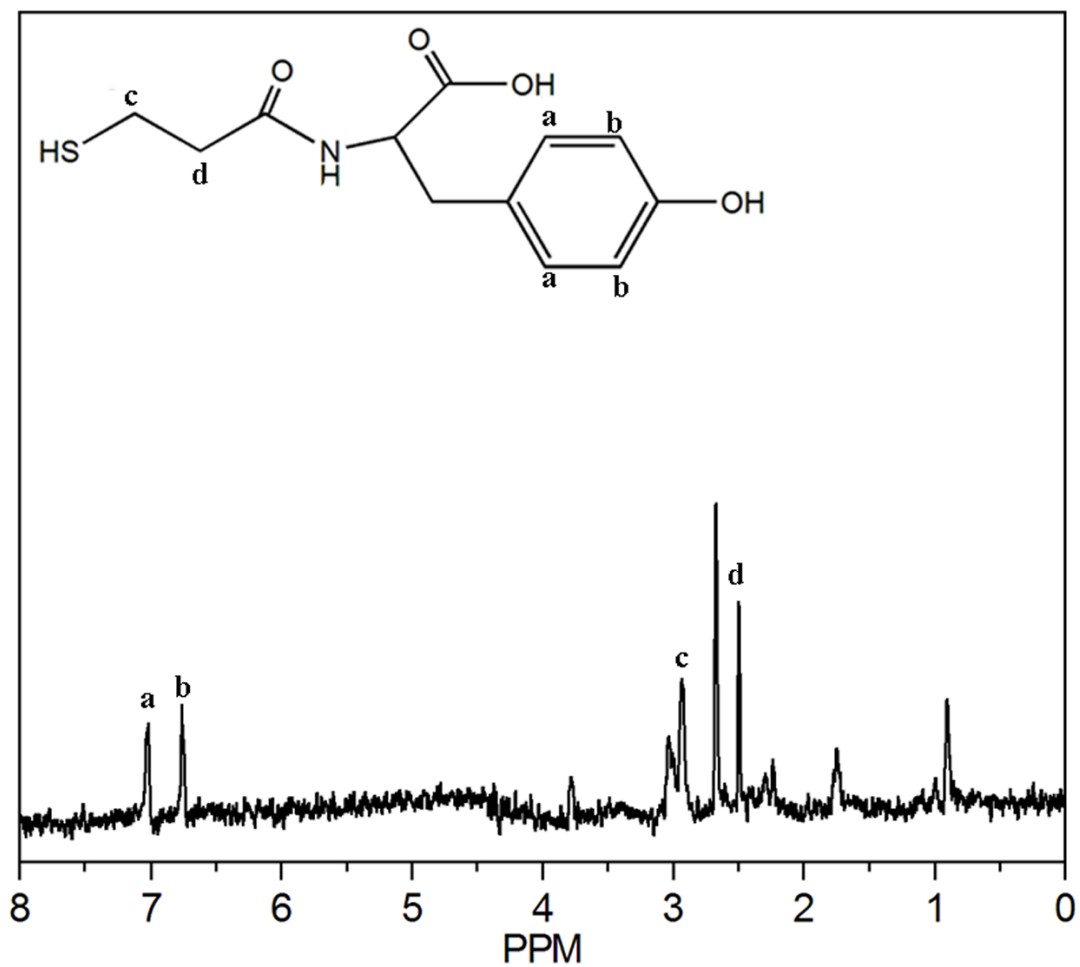

Fig. S2 <sup>1</sup>H NMR spectra of T-CuInS<sub>2</sub> QDs.

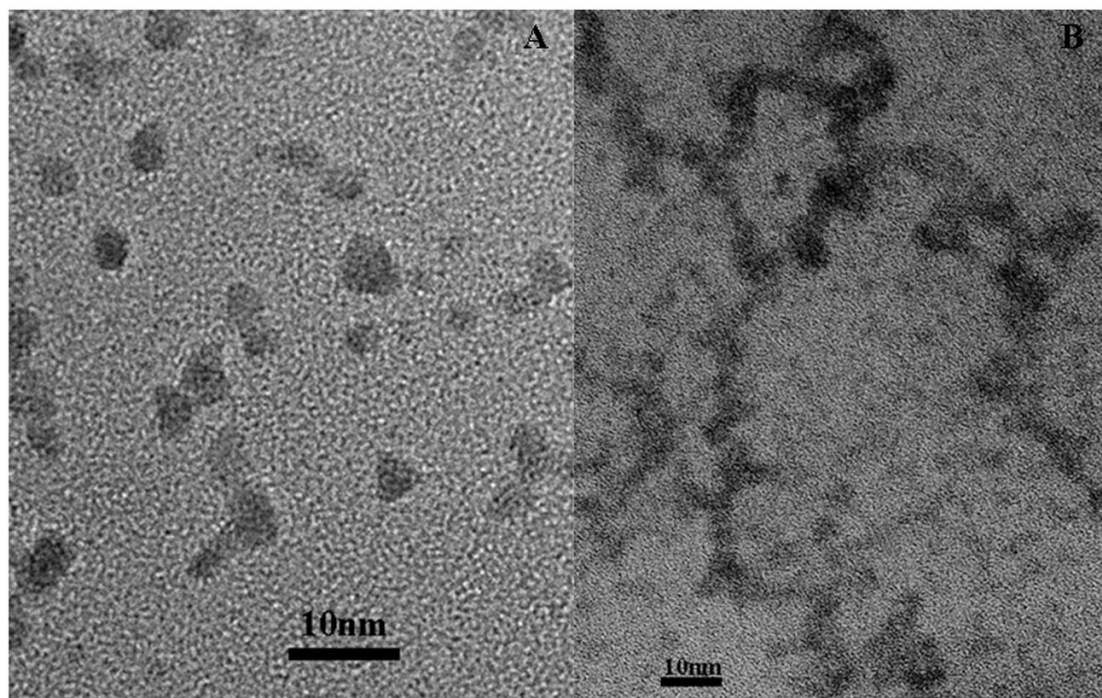

**Fig. S3** The TEM image of the (A) MPA-capped CuInS<sub>2</sub>QDs and (B) T-CuInS<sub>2</sub> QDs.

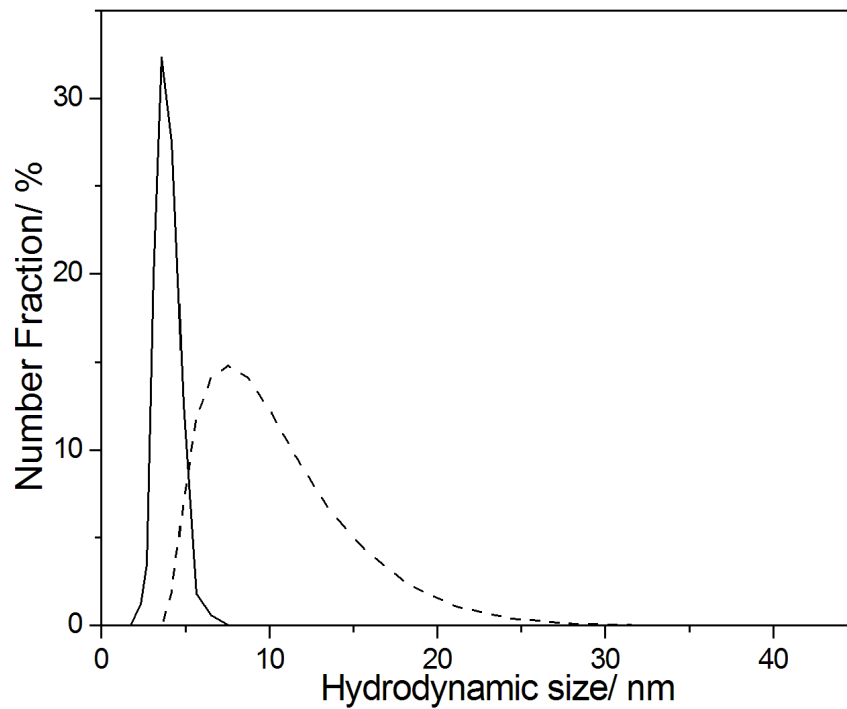

**Fig. S4** Dynamic light scattering data of MPA-capped CuInS<sub>2</sub>QDs (Solid line) and T-CuInS<sub>2</sub> QDs

(dash line)
